# Supplementary material
Source: PubMed Central journal article supplement (PMC3968393)
Supplement: supp_blood-2013-10-533562_blood-2013-10-533562-1.pdf [file supp_blood-2013-10-533562_blood-2013-10-533562-1.pdf]

## SUPPLEMENTAL DATA

Figure 1S

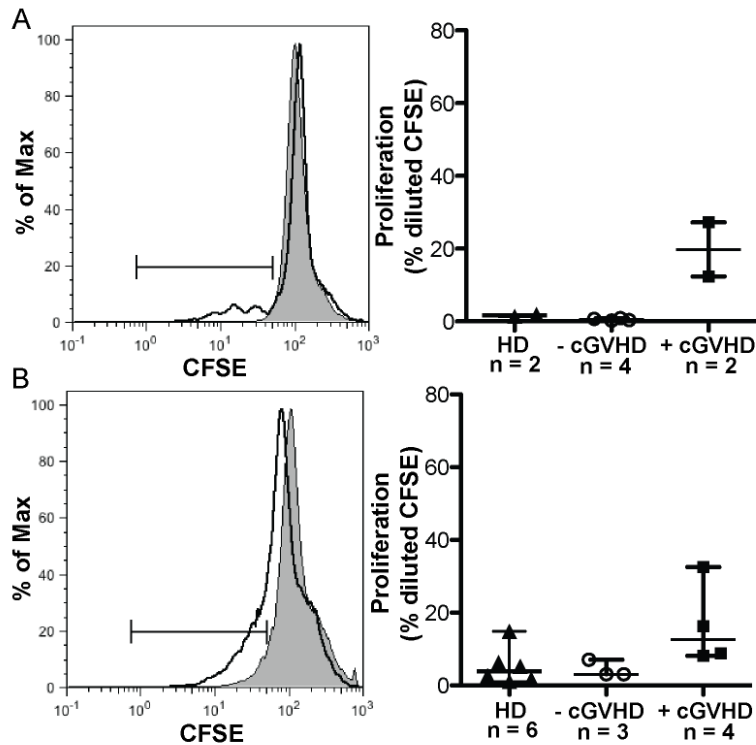

**Figure 1S. B cell proliferation in response to BCR stimulation.** B cells isolated from healthy donors and patients with and without cGVHD, stained with CFSE and stimulated with **(A)**  $\alpha$ -IgM (10  $\mu$ g/mL) or **(B)**  $\alpha$ -IgM +  $\alpha$ -IgG (10  $\mu$ g/mL) for 6 days. **(A-B)** Left: representative histograms of B cell proliferation from patients without cGVHD (gray area, thin line) and with cGVHD (white area, bold line). Right: frequency of B cell proliferation quantified in healthy donors, (HD, filled triangles) patients without cGVHD (-cGVHD, open circles) and with cGVHD (+cGVHD, filled squares).

**Figure 2S**

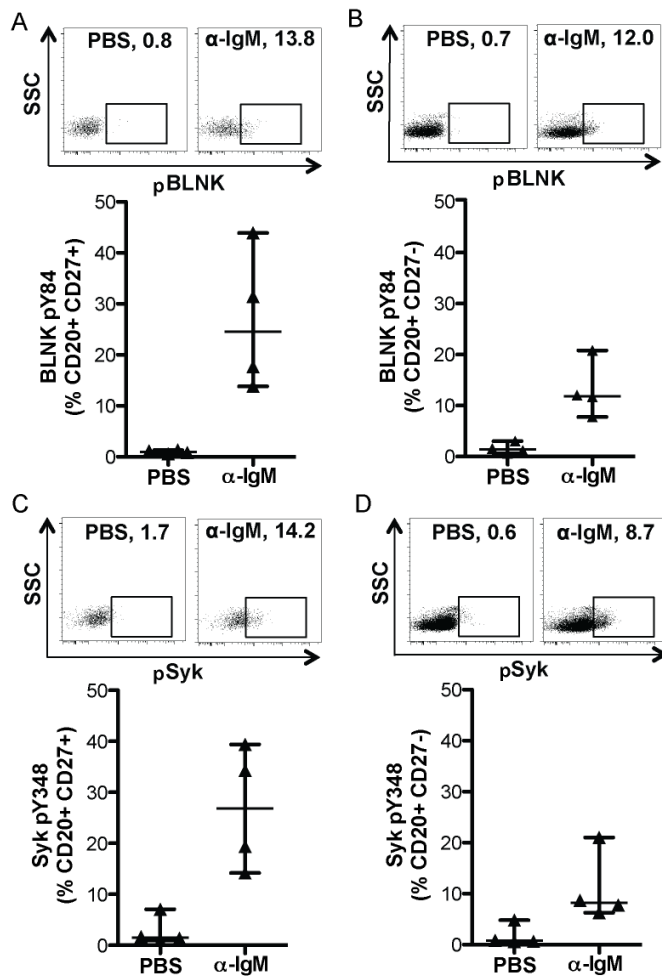

**Figure 2S. BCR-driven phosphorylation of BLNK and Syk in CD27+ and CD27- B cells from healthy donors.** Phosphorylation of BLNK (tyrosine 84) and Syk (tyrosine 348) in CD27+ and CD27- B cells (CD20+) stimulated with  $\alpha$ -IgM (5  $\mu$ g/mL) or PBS as a control as indicated for 5 min. **(A)** Top: representative dot plots of pBLNK in CD27+ B cells from healthy donors. Numbers indicate frequency of CD20+ CD27+ B cells that are pBLNK+. Bottom: frequency of BLNK phosphorylation in CD27+ B cells quantified in healthy donors (n = 4). **(B)** Top: representative dot plots of pBLNK in CD27- B cells from healthy donors. Numbers indicate frequency of CD20+ CD27- B cells that are pBLNK+. Bottom: frequency of BLNK phosphorylation in CD27- B cells quantified in healthy donors (n = 4). **(C)** Top: representative dot plots of pSyk in CD27+ B cells from healthy donors. Numbers indicate frequency of CD20+ CD27+ B cells that are pSyk+. Bottom: frequency of Syk phosphorylation in CD27+ B cells quantified in healthy donors (n = 4). **(D)** Top: representative dot plots of pSyk in CD27- B cells from healthy donors. Numbers indicate frequency of CD20+ CD27- B cells that are pSyk+. Bottom: frequency of Syk phosphorylation in CD27- B cells quantified in healthy donors (n = 4).

frequency of BLNK phosphorylation in CD27- B cells quantified in healthy donors (n = 4). **(C)** Top: representative dot plots of pSyk in CD27+ B cells from healthy donors. Numbers indicate frequency of CD20+ CD27+ B cells that are pSyk+. Bottom: frequency of Syk phosphorylation in CD27+ B cells quantified in healthy donors (n = 4). **(D)** Top: representative dot plots of pSyk in CD27- B cells from healthy donors. Numbers indicate frequency of CD20+ CD27- B cells that are pSyk+. Bottom: frequency of Syk phosphorylation in CD27- B cells quantified in healthy donors (n = 4).

**Figure 3S**

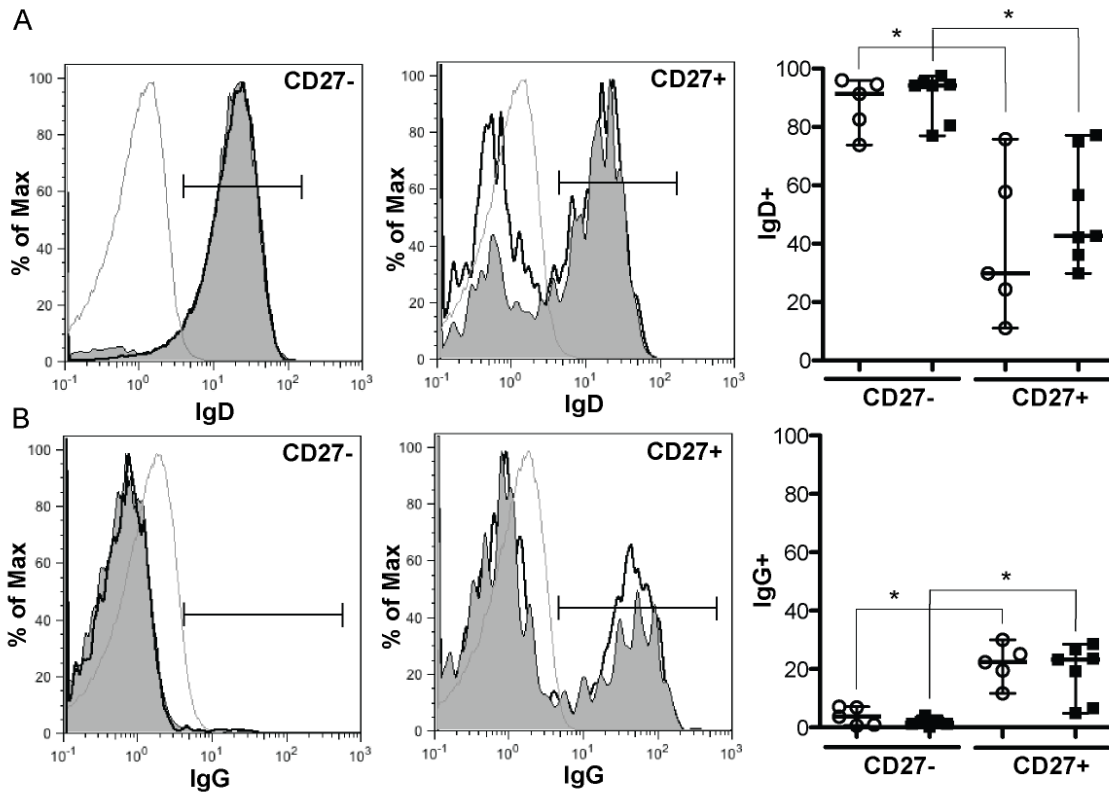

**Figure 3S. Surface expression of IgD and IgG is similar in CD27- and CD27+ B cells from patients with and without cGVHD.** Flow cytometric analysis of PBMCs for surface (A) IgD and (B) IgG expression as indicated. Isotypes are depicted as thin gray lines. Left: representative histogram of CD27- B cells (CD19+ CD20+) from a patient without cGVHD (gray area, thin line) and with cGVHD (white area, bold line). Center: representative histogram of CD27+ B cells (CD19+ CD20+) from a patient without cGVHD (gray area, thin line) and with cGVHD (white area, bold line). Right: frequency of (A) IgD or (B) IgG surface expression on CD27- and CD27+ B cells (CD19+ CD20+) quantified in patients without cGVHD (-cGVHD, n = 5, open circles) and with cGVHD

(+cGVHD, n = 7, filled squares). IgD: ANOVA,  $p < 0.0001$ ; \*  $p < 0.05$ . IgG ANOVA,  $p < 0.0001$ ; \*  $p < 0.05$ . Data are median +/- range pooled from 2 independent experiments.

**Figure 4S**

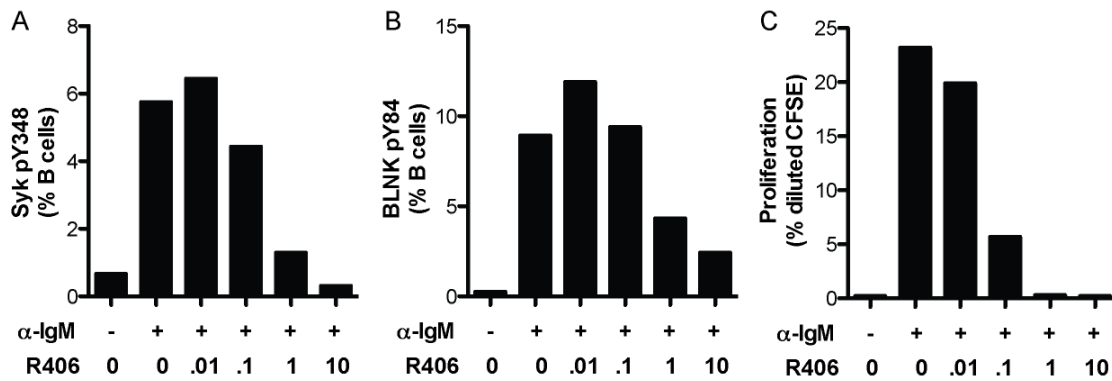

**Figure 4S. R406 inhibits phosphorylation of Syk and BLNK in B cells from a healthy donor *ex vivo*.** B cells purified from a healthy donor, treated with R406 (0, 0.01, 0.1, 1 and 10  $\mu\text{M}$ ) for 30 min and stimulated with  $\alpha\text{-IgM}$  (50  $\mu\text{g}/\text{mL}$ ) for 5 min as indicated. **(A)** Frequency of Syk phosphorylation (tyrosine 348). **(B)** Frequency of BLNK phosphorylation (tyrosine 84). **(C)** Proliferation of B cells purified from a healthy donor, stained with CFSE, treated with R406 (0, 0.01, 0.1, 1 and 10  $\mu\text{M}$ ) for 30 min and stimulated with  $\alpha\text{-IgM}$  (50  $\mu\text{g}/\text{mL}$ ) for 6 days as indicated.
